# Supplementary material for: A Computational Protocol Combining DFT and Cheminformatics for Prediction of pH-Dependent Redox Potentials
Source: MDPI journal article supplement (doi:10.3390/molecules26133978), 2021-06-29
Supplement: s1 [file s1]

# Supplementary Materials:

## A computational protocol combining DFT and cheminformatics for prediction of pH-dependent redox potentials

Rocco Peter Fornari <sup>1</sup> and Piotr de Silva <sup>1,\*</sup>

<sup>1</sup> Department of Energy Conversion and Storage, Technical University of Denmark, Anker Engellunds Vej 301, 2800 Kongens Lyngby, Denmark

\* Correspondence: pdes@dtu.dk

Table S1. Full chemical names of the molecules considered.

| Abbreviation | (common/commercial name): full name                             |
|--------------|-----------------------------------------------------------------|
| AQDH12       | (Alizarin): 1,2-dihydroxy-9,10-anthraquinone                    |
| AQDH14       | (Leucoquinizarin): 2,3-dihydro-9,10-dihydroxy-1,4-anthraquinone |
| AQDH15       | (Anthrarufin): 1,5-dihydroxy-9,10-anthraquinone                 |
| AQDH18       | (Chrysazin): 1,8-dihydroxy-9,10-anthraquinone                   |
| AQDH26       | (Anthraflavic acid): 2,6-dihydroxy-9,10-anthraquinone           |
| AQDS27       | 9,10-anthraquinone-2,7-disulfonate                              |
| AQDS15       | 9,10-anthraquinone-1,5-disulfonate                              |
| AQDS18       | 9,10-anthraquinone-1,8-disulfonate                              |
| AQS2         | 9,10-anthraquinone-2-sulfonate                                  |
| AQS2DH       | (Alizarin red s): 3,4-dihydroxy-9,10-anthraquinone-2-sulfonate  |
| AQS2NBr      | 1-amino-4-bromo-9,10-anthraquinone-2-sulfonate                  |
| AQDH45CA     | (Rhein): 4,5-dihydroxy-9,10-anthraquinone-2-carboxylic acid     |
| AQDH18MH     | (Aloemodin): 1,8-dihydroxy-3-(hydroxymethyl)-9,10-anthraquinone |
| AQTrHM       | (Emodin): 1,3,8-trihydroxy-6-methylanthracene-9,10-dione        |
| AQTH12       | (Quinalizarin): 1,2,5,8-tetrahydroxy-9,10-anthraquinone         |
| AQTH14       | 1,4,5,8-tetrahydroxy-9,10-anthraquinone                         |
| NQ12S        | 1,2-naphthoquinone-4-sulfonate                                  |
| NQ14HB       | (Lapachol): 2-hydroxy-3-(3-methyl-2-butenyl)-1,4-naphthoquinone |
| NQ14H        | 2-hydroxy-1,4-naphthoquinone                                    |
| HQ14S        | 2,5-dihydroxybenzenesulfonate                                   |
| HQ12         | Ortho hydroquinone                                              |
| HQ14         | Para hydroquinone                                               |
| HQ12DS       | (Tiron): 4,5-dihydroxy-1,3-benzenedisulfonate                   |
| BQ14DH       | 2,5-dihydroxy-1,4-benzoquinone                                  |
| BQ14DHDCI    | (Chloranilic acid): 2,5-dichloro-3,6-1,4-benzoquinone           |
| HQ14TCl      | Tetrachloro hydroquinone                                        |
| BQ14TH       | Tetrahydroxy-1,4-benzoquinone                                   |
| HQ14TF       | 1,2,4,5-tetrafluoro-3,6-dihydroxybenzene                        |

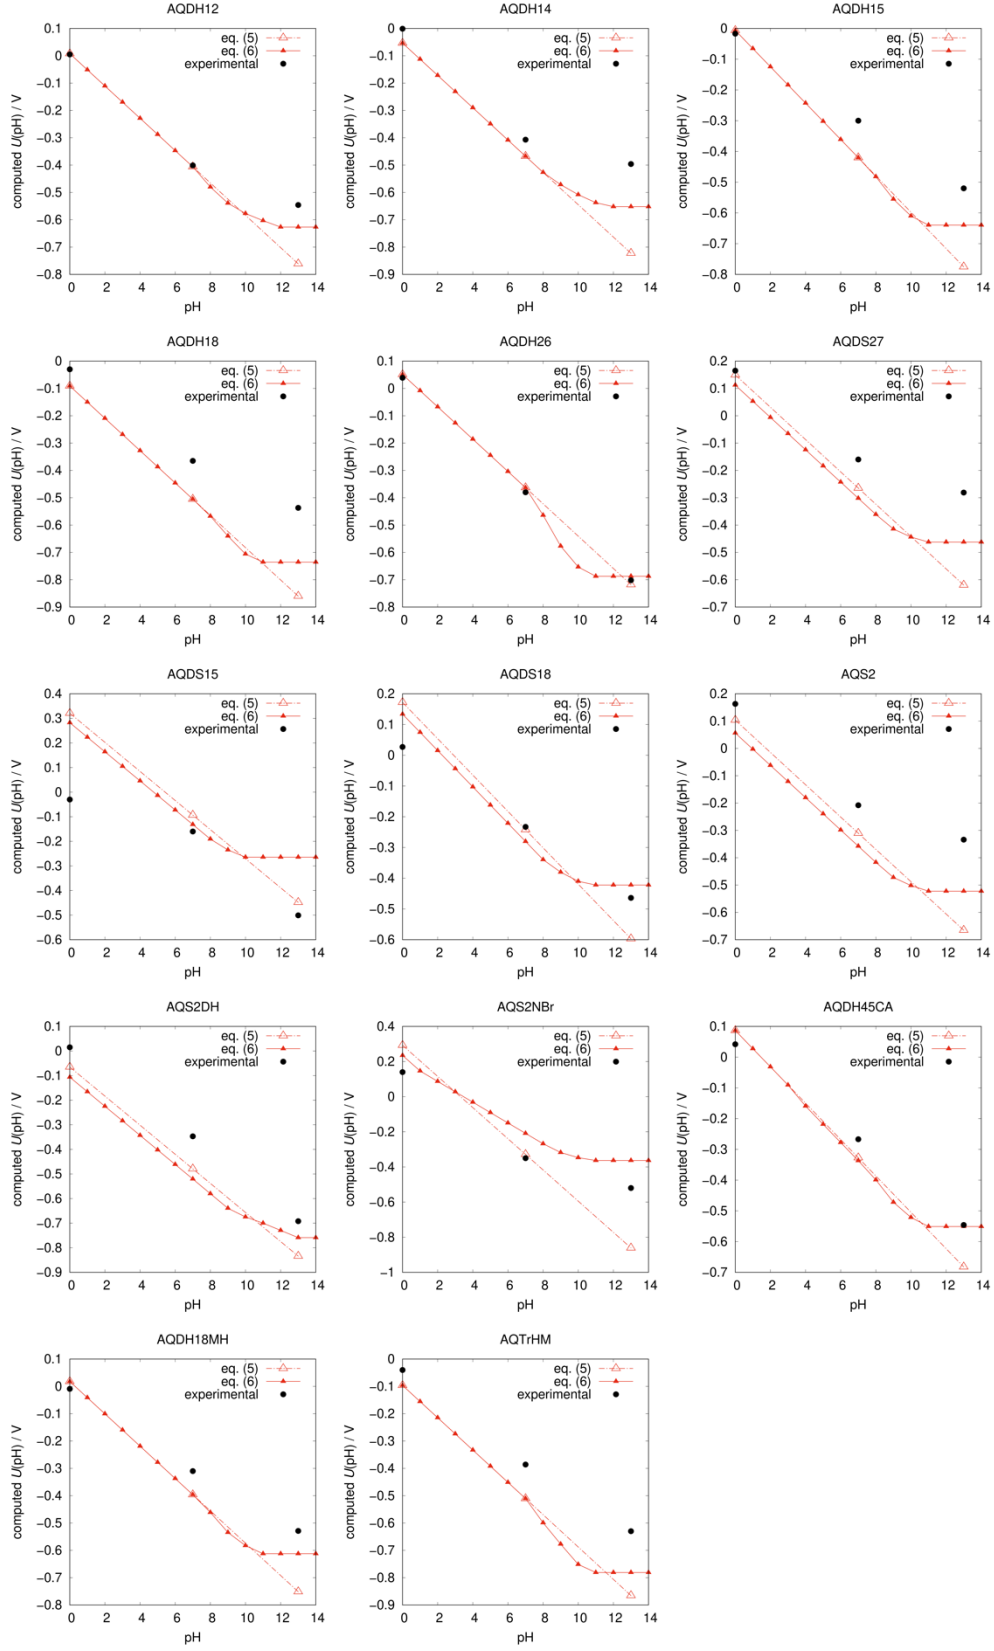

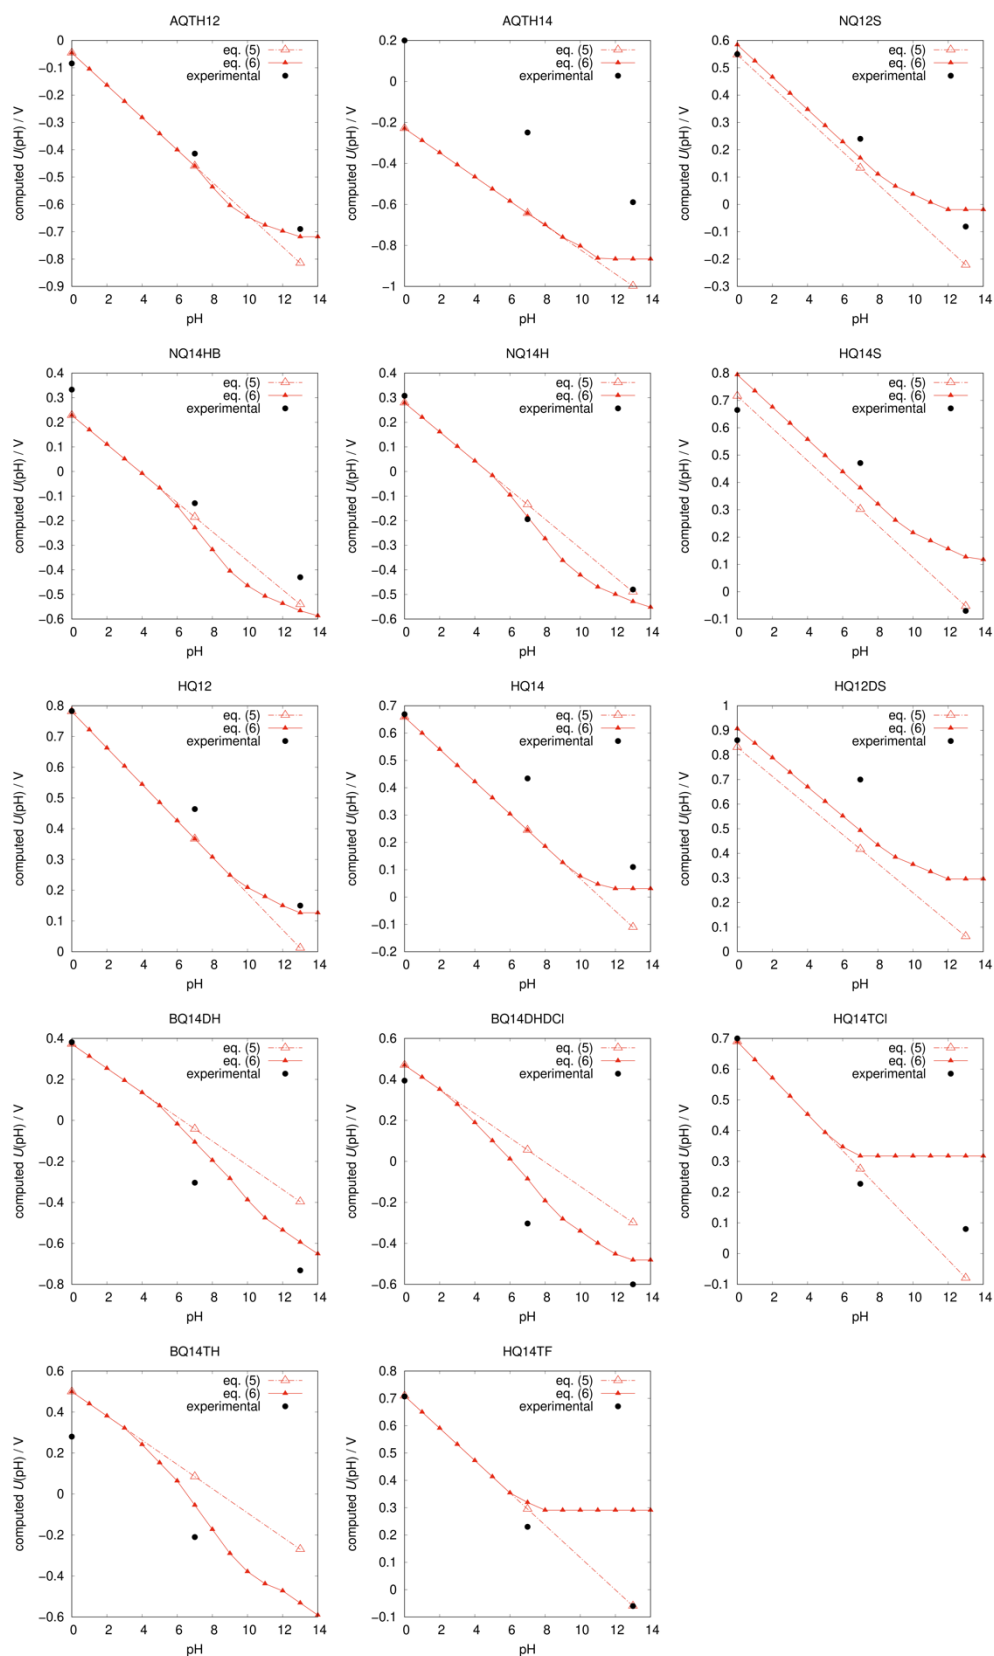

Figure S1. Pourbaix diagrams (potential vs pH) of all molecules, built with eqs. (5) and (6) (main text). Experimental potentials from ref. [17] are also shown.

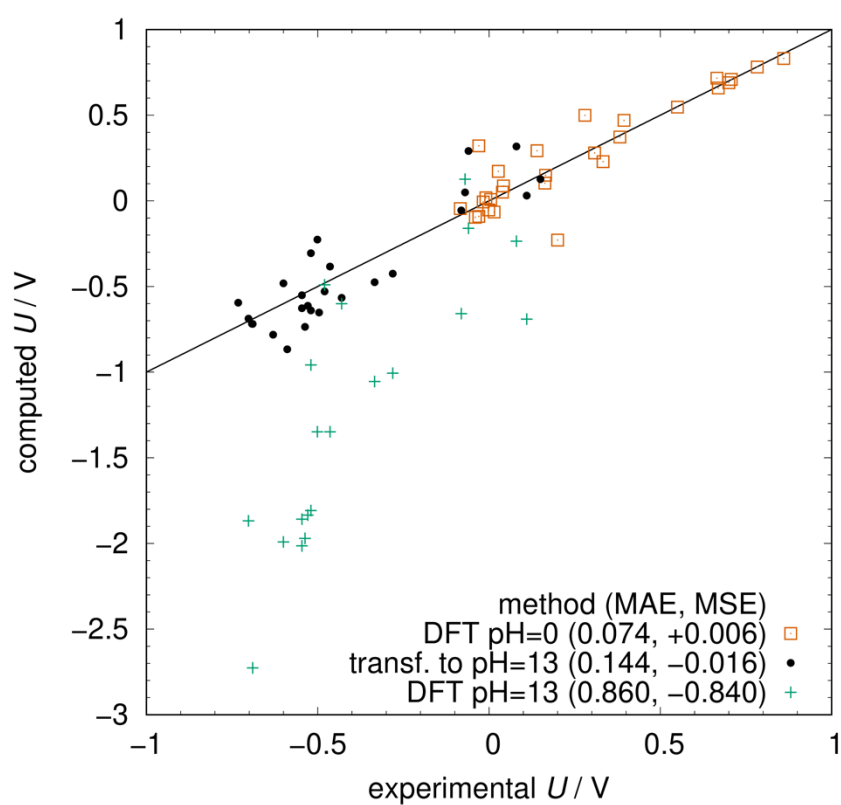

Figure S2. Computed vs. experimental redox potentials computed directly with DFT at pH=0 and 13, and transformed to pH 13. The DFT results at pH=13 are obtained by optimizing the molecular geometries in the pH=13 protonation state predicted by ChemAxon. The other data sets are discussed in the main text.
